# Supplementary material
Source: HighWire-hosted journal article supplement (https://bmjopen.bmj.com/content/12/2/e053223)
Supplement: inline-supplementary-material-4 [file inline-supplementary-material-4.pdf]

## Supplementary searches

| Trial Registers                                                                                                    | Search terms                                                                   |
|--------------------------------------------------------------------------------------------------------------------|--------------------------------------------------------------------------------|
| ClinicalTrials.gov                                                                                                 | "end of life" or palliative and mental                                         |
| metaRegister of Controlled Trials (mRCT)                                                                           | Not Applicable                                                                 |
| UK Clinical Trials Gateway (UKCTG)                                                                                 | "last year of life" or LYOL or "end of life" or "end of their lives" in mental |
| WHO ICTRP Search Portal International<br><a href="https://www.who.int/ictip/en/">https://www.who.int/ictip/en/</a> | "end of life" or "end of their lives" and mental                               |

| Charity websites                                                                                                                 | Search type                                                               | Search terms                                                                                                                       |
|----------------------------------------------------------------------------------------------------------------------------------|---------------------------------------------------------------------------|------------------------------------------------------------------------------------------------------------------------------------|
| 1. Cancer Research UK<br><a href="http://www.cancerresearchuk.org/">http://www.cancerresearchuk.org/</a>                         | Electronic search: Main website                                           | "end of life" and "mental illness/health"<br>"palliative care" and mental illness/health"                                          |
| 2. Cancer Research Wales<br><a href="http://www.cancerresearchuk.org/">http://www.cancerresearchuk.org/</a>                      | Electronic search: Main website                                           | "end of life" and "mental illness/health"<br>"palliative care" and mental illness/health"                                          |
| 3. Tenovus Cancer Care<br><a href="http://www.tenovuscancercare.org.uk/">http://www.tenovuscancercare.org.uk/</a>                | Electronic search: Main website                                           | "end of life" and "mental illness"                                                                                                 |
| 4. Mental Health Foundation<br><a href="https://www.mentalhealth.org.uk/">https://www.mentalhealth.org.uk/</a>                   | Electronic search: Main website<br><br>Manual search: Policy publications | "end of life" and "mental illness/health"<br>"palliative care" and mental illness/health"<br><br>As per reviews inclusion criteria |
| 5. Centre for Mental Health<br><a href="https://www.centreformentalhealth.org.uk/">https://www.centreformentalhealth.org.uk/</a> | Electronic search: Policy publications                                    | "end of life" and "mental illness/health"                                                                                          |

|                                                                                                                     |                                                                           |                                                                                                                                                                                             |
|---------------------------------------------------------------------------------------------------------------------|---------------------------------------------------------------------------|---------------------------------------------------------------------------------------------------------------------------------------------------------------------------------------------|
|                                                                                                                     |                                                                           | "palliative care" and mental illness/health"                                                                                                                                                |
| 6. National Kidney Foundation<br><a href="https://www.kidney.org/">https://www.kidney.org/</a>                      | Electronic search: Main website<br><br>Manual search: Policy publications | "end of life" and "mental illness/health"<br>"palliative care" and mental illness/health"<br><br>As per reviews inclusion criteria                                                          |
| 7. British Liver Trust<br><a href="https://www.britishlivertrust.org.uk/">https://www.britishlivertrust.org.uk/</a> | Electronic search: Publications                                           | "end of life" and "mental illness"<br>"palliative care" and mental illness"<br>(mental health too broad a term)                                                                             |
| 8. British Renal Society<br><a href="http://britishrenal.org/">http://britishrenal.org/</a>                         | Electronic search: Conference abstracts                                   | "end of life" and "mental illness/health"<br>"palliative care" and mental illness/health"                                                                                                   |
| 9. The Renal Association<br><a href="http://britishrenal.org/">http://britishrenal.org/</a>                         | Electronic search: Main website                                           | "end of life" and "mental illness/health"<br>"palliative care" and mental illness/health"                                                                                                   |
| 10. British Heart Foundation<br><a href="http://britishrenal.org/">http://britishrenal.org/</a>                     | Electronic search: Main website                                           | "last year of life" or LYOL or "end of life" or "end of their lives" and "severe mental" and Healthcare professionals<br>"palliative care" and mental illness"<br>(mental health too broad) |
| 11. British Lung Foundation<br><a href="https://www.blf.org.uk/">https://www.blf.org.uk/</a>                        | Electronic search: Main website                                           | "end of life" and "mental illness/health"<br>"palliative care" and mental illness/health"                                                                                                   |
| 12. Hospice UK<br><a href="http://www.hospiceuk.org/">http://www.hospiceuk.org/</a>                                 | Electronic search: Main website                                           | "end of life" and "mental illness/health"<br>"palliative care" and mental illness/health"                                                                                                   |
| 13. Marie Curie<br><a href="https://www.mariecurie.org.uk/">https://www.mariecurie.org.uk/</a>                      | Electronic search: Main website                                           | "end of life" and "mental illness/health"<br>"palliative care" and mental illness/health"                                                                                                   |

|                                                                                                             |                                 |                                                                                                                                          |
|-------------------------------------------------------------------------------------------------------------|---------------------------------|------------------------------------------------------------------------------------------------------------------------------------------|
|                                                                                                             | Manual search: Briefings        | As per reviews inclusion criteria                                                                                                        |
| 14. Macmillan Cancer Support<br><a href="https://www.macmillan.org.uk/">https://www.macmillan.org.uk/</a>   | Electronic search: Main website | "last year of life" or LYOL or "end of life" or "end of their lives" and "severe mental"<br>"palliative care" and mental illness/health" |
| 15. Bipolar UK<br><a href="https://www.bipolaruk.org/">https://www.bipolaruk.org/</a>                       | Electronic search: Main website | "end of life" and "mental illness/health"<br>Palliative                                                                                  |
| 16. MIND<br><a href="https://www.mind.org.uk/">https://www.mind.org.uk/</a>                                 | Electronic search: Main website | "end of life care" and "mental illness/health"<br>Palliative                                                                             |
| 17. Rethink Mental Illness<br><a href="https://www.rethink.org/">https://www.rethink.org/</a>               | Electronic search: Main website | "end of life care" and "mental illness/health"<br>Palliative                                                                             |
| 18. Sova<br><a href="https://www.sova.org.uk/">https://www.sova.org.uk/</a>                                 | Electronic search: Main website | "end of life care" and mental<br>Palliative                                                                                              |
| 19. Hafal: for recovery for serious mental illness<br><a href="http://www.hafal.org">www.hafal.org</a>      | Electronic search: Main website | "end of life care" and mental<br>Palliative and mental                                                                                   |
| 20. Age Concern<br><a href="https://www.ageuk.org.uk">https://www.ageuk.org.uk</a>                          | Electronic search: Main website | "end of life care " and mental<br>Palliative and mental                                                                                  |
| 21. Salvation Army<br><a href="https://salvationarmy.org.uk">https://salvationarmy.org.uk</a>               | Electronic search: Main website | "end of life care" and mental<br>Palliative and mental                                                                                   |
| 22. Dying Matters<br><a href="https://www.dyingmatters.org/">https://www.dyingmatters.org/</a>              | Electronic search: Main website | "end of life " and mental<br>"palliative care" and mental illness/health"                                                                |
| 23. Care Not Killing<br><a href="https://www.carenotkilling.org.uk/">https://www.carenotkilling.org.uk/</a> | Electronic search: Main website | "end of life care" and then searched within results<br>for the term mental                                                               |

|                                                                                                             |                                         |                                                                        |
|-------------------------------------------------------------------------------------------------------------|-----------------------------------------|------------------------------------------------------------------------|
|                                                                                                             |                                         | "palliative care" and then searched within results for the term mental |
| 24. Northern Ireland Hospice<br><a href="https://www.nihospice.org/">https://www.nihospice.org/</a>         | Electronic search: Main website         | "end of life care" and mental Palliative                               |
| 25. Mental Health UK<br><a href="https://www.mentalhealth-uk.org/">https://www.mentalhealth-uk.org/</a>     | No search facility or publications page |                                                                        |
| 26. Heads Together<br><a href="https://www.headstogether.org.uk/">https://www.headstogether.org.uk/</a>     | No search facility or publications page |                                                                        |
| 27. Kidney Research UK<br><a href="https://www.kidneyresearchuk.org/">https://www.kidneyresearchuk.org/</a> | Electronic search: Main website         | "end of life care" and mental Palliative                               |
| 28. National Kidney Federation<br><a href="https://www.kidney.org.uk/">https://www.kidney.org.uk/</a>       | Electronic search: Main website         | "end of life care" and mental Palliative                               |
| 29. St Mungos<br><a href="https://www.mungos.org/">https://www.mungos.org/</a>                              | Electronic search: Main website         | "end of life "<br>Palliative<br>"mental illness"                       |
| 30. Samaritans<br><a href="https://www.samaritans.org/">https://www.samaritans.org/</a>                     | Electronic search: Main website         | "end of life" and "severe mental"<br>Palliative and "severe mental"    |
| 31. Llanmau<br><a href="https://www.llanmau.org.uk/">https://www.llanmau.org.uk/</a>                        | Electronic search: Main website         |                                                                        |
| 32. SSAFA<br><a href="https://www.ssafa.org.uk/">https://www.ssafa.org.uk/</a>                              | Electronic search: Main website         |                                                                        |
| 33. Community Housing Cymru:<br><a href="https://chcymru.org.uk/">https://chcymru.org.uk/</a>               | Electronic search: Main website         |                                                                        |
| 34. National Housing Federation:<br><a href="https://www.housing.org.uk/">https://www.housing.org.uk/</a>   | Electronic search: Main website         |                                                                        |
| 35. Shelter Cymru<br><a href="https://sheltercymru.org.uk/">https://sheltercymru.org.uk/</a>                | Electronic search: Main website         |                                                                        |

|                                                                                                                                              |                                                                              |                                   |
|----------------------------------------------------------------------------------------------------------------------------------------------|------------------------------------------------------------------------------|-----------------------------------|
| 36. Shelter<br><a href="https://www.shelter.org.uk/">https://www.shelter.org.uk/</a>                                                         | Electronic search: Main website                                              |                                   |
| 37. Gofal<br><a href="http://www.gofal.org.uk/">http://www.gofal.org.uk/</a>                                                                 | No search function checked projects & services page but no relevant reports. | As per reviews inclusion criteria |
| 38. Compassionate communities<br><a href="https://www.compassionate-communitiesuk.co.uk/">https://www.compassionate-communitiesuk.co.uk/</a> | No search function checked projects but no relevant reports                  | As per reviews inclusion criteria |
| 39. Byw Nawr<br><a href="https://www.dyingmatters.org/wales">https://www.dyingmatters.org/wales</a>                                          | Electronic search: Main website                                              |                                   |
| 40. Combat Stress<br><a href="https://www.combatstress.org.uk/">https://www.combatstress.org.uk/</a>                                         | Electronic search: Main website                                              |                                   |
| 41. Royal British Legion<br><a href="https://www.britishlegion.org.uk/">https://www.britishlegion.org.uk/</a>                                | Electronic search: Main website                                              |                                   |

| Organisation Websites                                                                                                                                                                                                                                                                                                         | Search type                                                                                 | Search terms                                                                              |
|-------------------------------------------------------------------------------------------------------------------------------------------------------------------------------------------------------------------------------------------------------------------------------------------------------------------------------|---------------------------------------------------------------------------------------------|-------------------------------------------------------------------------------------------|
| 1. NHS England<br><a href="https://www.england.nhs.uk/cancer/strategy/">https://www.england.nhs.uk/cancer/strategy/</a><br><a href="https://www.england.nhs.uk/eolc/resources/">https://www.england.nhs.uk/eolc/resources/</a> -<br><a href="http://endoflifecareambitions.org.uk/">http://endoflifecareambitions.org.uk/</a> | Electronic search: Main website                                                             | "mental illness"                                                                          |
| 2. NHS Wales<br><a href="http://www.wales.nhs.uk/">http://www.wales.nhs.uk/</a>                                                                                                                                                                                                                                               | Electronic search: Main website<br>Advanced search: title field only                        | "end of life" and "mental illness/health"<br>"palliative care" and mental illness/health" |
| 3. Welsh Government<br><a href="https://gov.wales/">https://gov.wales/</a>                                                                                                                                                                                                                                                    | Electronic search: Main website<br>Advanced search<br>Limited to Health and social services | "end of life" and "mental illness/health"<br>"palliative care" and mental illness/health" |
| 4. Department of Health and Social Care<br><a href="https://www.gov.uk/">https://www.gov.uk/</a>                                                                                                                                                                                                                              | Electronic search: Publications<br>Limited by:                                              | "end of life" and "mental illness/health"<br>"palliative care" and mental illness/health" |

|                                                                                                            |                                                                                                                                                                   |                                                                                           |
|------------------------------------------------------------------------------------------------------------|-------------------------------------------------------------------------------------------------------------------------------------------------------------------|-------------------------------------------------------------------------------------------|
|                                                                                                            | Department of Health and Social Care<br>Topic: Health and Social Care<br>Sub topic: End of Life                                                                   |                                                                                           |
| 5. Department of Health: Northern Ireland                                                                  |                                                                                                                                                                   | "end of life" and "mental illness/health"<br>"palliative care" and mental illness/health" |
| 6. Department of Health, Social Services and Public Safety: Northern Ireland                               |                                                                                                                                                                   | "end of life" and "mental illness/health"<br>"palliative care" and mental illness/health" |
| 7. Ministry of Justice<br><a href="https://www.gov.uk/">https://www.gov.uk/</a>                            | Electronic search: Publications<br>Limited by: Ministry of Justice<br>Topic: Health and Social Care<br>Sub Topic: End of Life                                     | "end of life" and "mental illness/health"<br>"palliative care" and mental illness/health" |
| 8. Care Inspectorate Wales<br><a href="https://www.qcs.co.uk/wales/">https://www.qcs.co.uk/wales/</a>      | Searching only available with practitioner registration<br>Emailed – no relevant publications                                                                     |                                                                                           |
| 9. Care Quality Commission<br><a href="https://www.cqc.org.uk/">https://www.cqc.org.uk/</a>                | Electronic search: Publications                                                                                                                                   | "end of life" and "severe mental"<br>"palliative care" and "mental illness"               |
| 10. Prisons and Probation Ombudsman<br><a href="https://www.ppo.gov.uk">https://www.ppo.gov.uk</a>         | Electronic search: Main website<br><br>Manual search: Fatal incident reports over a one year period between June 2017-18.<br>Limited by: Deaths of natural causes | "end of life"<br><br>As per reviews inclusion criteria                                    |
| 11. Royal College of Psychiatrists<br><a href="https://www.rcpsych.ac.uk/">https://www.rcpsych.ac.uk/</a>  | Manual search: College Reports                                                                                                                                    | As per reviews inclusion criteria                                                         |
| 12. Royal College of Physicians<br><a href="https://www.rcplondon.ac.uk/">https://www.rcplondon.ac.uk/</a> | Electronic search: Main website                                                                                                                                   | "end of life" and "mental illness/health"<br>"palliative care" and mental illness/health" |
| 13. The Worldwide Hospice and Palliative Care Alliance                                                     | Manual search: Resources                                                                                                                                          | As per reviews inclusion criteria                                                         |

|                                                                                                                                                                                                                                             |                                                                 |                                                                                                           |
|---------------------------------------------------------------------------------------------------------------------------------------------------------------------------------------------------------------------------------------------|-----------------------------------------------------------------|-----------------------------------------------------------------------------------------------------------|
| <a href="http://www.thewhpca.org/">http://www.thewhpca.org/</a>                                                                                                                                                                             |                                                                 |                                                                                                           |
| 14. European Association of Palliative Care<br><a href="https://www.eapcnet.eu/">https://www.eapcnet.eu/</a>                                                                                                                                | Manual search: National Guidelines<br>(UK Countries only)       | As per reviews inclusion criteria                                                                         |
| 15. Scottish Partnership agency for Palliative Care<br><a href="https://www.palliativecarescotland.org.uk/">https://www.palliativecarescotland.org.uk/</a>                                                                                  | Electronic search: Main website                                 | "end of life care" and "mental illness" and<br>evaluation<br>"palliative care" and mental illness/health" |
| 16. National Council for Palliative Care<br><a href="http://www.ncpc.org.uk/">http://www.ncpc.org.uk/</a>                                                                                                                                   | Electronic search: Main website                                 | "end of life" and "mental illness/health"<br>"palliative care" and mental illness/health""                |
| 17. Social Care Institute for Excellence<br><a href="https://www.scie.org.uk/">https://www.scie.org.uk/</a>                                                                                                                                 | Electronic search: Main website                                 | "end of life" and "mental illness"<br>"palliative care" and mental illness"                               |
| 18. Health Improvement Scotland<br><a href="http://www.healthcareimprovementscotland.org/">http://www.healthcareimprovementscotland.org/</a><br>Covers publications by NHS Scotland, Scottish<br>Government and Health Improvement Scotland | Electronic search: Main website                                 | "end of life" and "mental illness"<br>"palliative care" and mental illness"                               |
| 19. National Institute of Clinical Excellence.<br><a href="https://www.nice.org.uk/guidance">https://www.nice.org.uk/guidance</a>                                                                                                           | Electronic search: Main website                                 | "end of life" or "palliative care"<br>"mental illness"                                                    |
| 20. Royal College of Nursing<br><a href="https://www.rcn.org.uk/clinical-topics/end-of-life-care">https://www.rcn.org.uk/clinical-topics/end-of-life-care</a>                                                                               | Manual search through section on Clinical<br>Topics End of Life | As per reviews inclusion criteria                                                                         |
| 21. Gold Standards Framework<br><a href="http://www.goldstandardsframework.org.uk/">http://www.goldstandardsframework.org.uk/</a>                                                                                                           | Manual search through library resources                         | As per reviews inclusion criteria                                                                         |

| Hand searching journals                | Search terms                                                                                                                                           |
|----------------------------------------|--------------------------------------------------------------------------------------------------------------------------------------------------------|
| Journal of Pain and Symptom Management | "end of life care" in <i>Title/Abs/Keywords</i> OR "palliative care" in <i>Title/Abs/Keywords</i> AND Mental in <i>Title/Abs/Keywords</i><br>2017-2019 |
| Cancer                                 | "end of life" and mental or palliative and mental<br>2017-2019                                                                                         |
| Psycho-Oncology                        | "end of life" and mental (2017-2019 ) or palliative and mental (2017-2018)                                                                             |
| BMJ Supportive & Palliative Care       | "mental illness" and published between "01 Jan, 2017 and 21 Feb, 2019" and published between "01 Jan, 2017 and 21 Feb, 2019"                           |

Google search using the terms "palliative care" and "mental illness" (searching first 10 pages of output)

| Output                                                                                                                                                                                                                                                                                                                                                                                                                                                                                                                                                                                                                                                                                                                                                                                                                  | Action                                                                                       |                 |
|-------------------------------------------------------------------------------------------------------------------------------------------------------------------------------------------------------------------------------------------------------------------------------------------------------------------------------------------------------------------------------------------------------------------------------------------------------------------------------------------------------------------------------------------------------------------------------------------------------------------------------------------------------------------------------------------------------------------------------------------------------------------------------------------------------------------------|----------------------------------------------------------------------------------------------|-----------------|
| Naylor et al 2016. Bringing together physical and mental health: A new frontier for integrated care. Available from: <a href="https://www.kingsfund.org.uk/publications/physical-and-mental-health">https://www.kingsfund.org.uk/publications/physical-and-mental-health</a>                                                                                                                                                                                                                                                                                                                                                                                                                                                                                                                                            | Searched and added to table                                                                  | Relevant report |
| Help the Hospices. 2016 Hospice and palliative care – Access for All. Available from: <a href="http://nican.hscni.net/files/hospice_and_palliative_care_access_for_all.pdf">http://nican.hscni.net/files/hospice_and_palliative_care_access_for_all.pdf</a> Accessed 31 January 2019                                                                                                                                                                                                                                                                                                                                                                                                                                                                                                                                    | Searched and added to table                                                                  | Relevant report |
| Ulster University Repository<br>Walsh, S. Sheridan, A. Leavey, G. Coughlan, B. Frazer, K. O'Toole, S. Kemple, M. Crawley, L. (2014) Identifying and addressing the palliative care needs of people with serious mental illness in Ireland. Irish College of General Practitioners, 31(7). p.1<br><br>Sheridan, A. Coughlan, B. Frazer, K. Walsh, S. Bergin, J. A. Crawley, L. Kemple, M. O'Toole, S. (n.d.) The palliative care needs of people with serious mental illness in Ireland. <a href="http://www.professionalpalliativehub.com/sites/default/files/Palliative%20Care%20need%20of%20People%20with%20SMI%20June%2015%202017%20Report%20Draft.pdf">http://www.professionalpalliativehub.com/sites/default/files/Palliative%20Care%20need%20of%20People%20with%20SMI%20June%2015%202017%20Report%20Draft.pdf</a> | Screened<br><br>Email sent to author 20-02-2019 via researchers gate for date of publication | Relevant paper  |



|                                                                                                                                                                                                                                                                                                                                                                                                  |                                                                             |                 |
|--------------------------------------------------------------------------------------------------------------------------------------------------------------------------------------------------------------------------------------------------------------------------------------------------------------------------------------------------------------------------------------------------|-----------------------------------------------------------------------------|-----------------|
| NHS Lothian. 2010. Living and dying well in Lothian. Available from: <a href="https://www.nhslothian.scot.nhs.uk/OurOrganisation/Strategies/ladwinlothian/Documents/Palliative%20Care%20Strategy%202010%20-15%20VER%2023%20FINAL.pdf">https://www.nhslothian.scot.nhs.uk/OurOrganisation/Strategies/ladwinlothian/Documents/Palliative%20Care%20Strategy%202010%20-15%20VER%2023%20FINAL.pdf</a> | Searched and added to table                                                 | Relevant Report |
| alex.mathew@wales.nhs.uk.<br>End of life care for older people with schizophrenia and bipolar affective disorder along with long term physical conditions: a phenomenological enquiry into the experiences of bereaved family carers, mental health and social care providers in South Wales-UK                                                                                                  | Email sent 20 <sup>th</sup> Feb 2019                                        | NOT RELEVANT    |
| Queens University. Belfast Repository<br>Millman, J. Galway, K. Santin, O. Reid J. (2016) Cancer and serious mental illness – patient, caregiver and professional perspectives: study protocol. Journal of Advanced Nursing 72(1), 217–226                                                                                                                                                       | Author search conducted on PubMed and full study findings not yet published | NOT RELEVANT    |
| Bloomer, M. J. O'Brien, A. P. (2013) Palliative care for the person with a serious mental illness: The need for a partnership approach to care in Australia, Progress in Palliative Care, 21:1, 27-31                                                                                                                                                                                            | Screened                                                                    | Not relevant    |

Google search using the terms “end of life” and “mental illness” (searching first 10 pages of output)

| Output                                                                                                                                                                                                                                                                                                                                                                                                                                                              | Action   |                 |
|---------------------------------------------------------------------------------------------------------------------------------------------------------------------------------------------------------------------------------------------------------------------------------------------------------------------------------------------------------------------------------------------------------------------------------------------------------------------|----------|-----------------|
| Blog post<br>Paul Gionfriddo and Nathaniel Counts<br>“Providing end-of-life support for elders with serious mental illnesses” Health Affairs Blog, November 16, 2017.DOI: 10.1377/hblog20171114.475106                                                                                                                                                                                                                                                              | Screened | 1. Not Relevant |
| Doering, P. End of life care and serious persistent mental illness. Regional Palliative Care Services. June 2018, Issue 42, p. 1-3<br><a href="https://www.northernhealth.ca/sites/northern_health/files/health-professionals/palliative-care/documents/serious-persistent-mental-illness-issue-42.pdf">https://www.northernhealth.ca/sites/northern_health/files/health-professionals/palliative-care/documents/serious-persistent-mental-illness-issue-42.pdf</a> | Screened | 2. Not relevant |
| Ahearn 2015. The loneliness of mental illness at the end of life.                                                                                                                                                                                                                                                                                                                                                                                                   | Screened | 3. Not relevant |

|                                                                                                                                                                                                                                                                                                                                                                                                                                                                                                      |          |              |
|------------------------------------------------------------------------------------------------------------------------------------------------------------------------------------------------------------------------------------------------------------------------------------------------------------------------------------------------------------------------------------------------------------------------------------------------------------------------------------------------------|----------|--------------|
| <a href="https://www.wisconsinmedicalsociety.org/_WMS/publications/wmj/pdf/117/3/101.pdf">https://www.wisconsinmedicalsociety.org/_WMS/publications/wmj/pdf/117/3/101.pdf</a>                                                                                                                                                                                                                                                                                                                        |          |              |
| WA Cancer and Palliative Care Network 2018. WA End-of-Life and Palliative Care Strategy 2018–2028. Available from: <a href="https://ww2.health.wa.gov.au/~media/Files/Corporate/general%20documents/Health%20Networks/Palliative%20care/WA%20End-of-life%20and%20Palliative%20Care%20Strategy%202018-2028.pdf">https://ww2.health.wa.gov.au/~media/Files/Corporate/general%20documents/Health%20Networks/Palliative%20care/WA%20End-of-life%20and%20Palliative%20Care%20Strategy%202018-2028.pdf</a> | Screened | Not relevant |
| National Association of Social workers 2004. NASW Standards for Palliative & End of Life Care. Available from: <a href="https://www.socialworkers.org/LinkClick.aspx?fileticket=xBMd58VwEhk%3D&amp;portalid=0">https://www.socialworkers.org/LinkClick.aspx?fileticket=xBMd58VwEhk%3D&amp;portalid=0</a>                                                                                                                                                                                             | Screened | Not relevant |
| NSW Ministry of Health 2015. Dignity, Respect and Choice: Advance Care Planning for End of Life for People with Mental Illness - A Comprehensive Guide. Available at: <a href="https://www.health.nsw.gov.au/patients/acp/Pages/comprehensive-guide.aspx">https://www.health.nsw.gov.au/patients/acp/Pages/comprehensive-guide.aspx</a> . NSW Government                                                                                                                                             | Screened | Not relevant |

Google search using the terms using the terms “end of life” and schizophrenia (searching first 5 pages of output)

| Output                                                                                                                 | Action   |             |
|------------------------------------------------------------------------------------------------------------------------|----------|-------------|
| Steves and Williams 2016<br>Enhancing end-of-life care for terminally ill psychiatric patients<br>Nursing, 46(8): 54-8 | screened | 8. Relevant |

Google search using the terms “end of life” and bipolar (searching first 5 pages of output)

| Output                                                                                                                                                                                                                                                                                                                     | Action   |          |
|----------------------------------------------------------------------------------------------------------------------------------------------------------------------------------------------------------------------------------------------------------------------------------------------------------------------------|----------|----------|
| Maloney, K. Opinion: My husband refused to believe he had bipolar disorder, and denial destroyed him. May 15th 2014<br><a href="https://www.thejournal.ie/readme/bipolar-ii-disorder-denial-mental-health-1467162-May2014/">https://www.thejournal.ie/readme/bipolar-ii-disorder-denial-mental-health-1467162-May2014/</a> | Screened | Relevant |

## Journal articles and reports suggested by stakeholder advisory members

| Output                                                                                                                                                                                                                                                                                                                                                  | Action                                                                                                       |                 |
|---------------------------------------------------------------------------------------------------------------------------------------------------------------------------------------------------------------------------------------------------------------------------------------------------------------------------------------------------------|--------------------------------------------------------------------------------------------------------------|-----------------|
| Kurella, M. Kimmel, P. L. Young, B.S. Chertow, G. M.<br>Suicide in the United States end-stage renal disease program. Journal of the American Society of Nephrology. 2005: 16(3): 774-81<br><a href="https://jasn.asnjournals.org/content/16/3/774.full">https://jasn.asnjournals.org/content/16/3/774.full</a>                                         | Screened                                                                                                     | 1. Not relevant |
| Liu, C-H. Yeh, M-K. Weng, S-C. Bai, M-Y. Chang, J-C.<br>Suicide and chronic kidney disease: a case-control study. Nephrology Dialysis Transplantation. 2017: 2(9): 1524–29                                                                                                                                                                              | Screened                                                                                                     | 2. Not relevant |
| Prison and Probation Ombudsman for England and Wales 2013<br>Learning from PPO Investigations. End of Life Care                                                                                                                                                                                                                                         | Searched and added to table                                                                                  | 3. Not relevant |
| Prison and Probation Ombudsman for England and Wales 2019<br>Fatal Incident Reports.<br><a href="https://www.ppo.gov.uk/document/fii-report/">https://www.ppo.gov.uk/document/fii-report/</a>                                                                                                                                                           | Searched through 2 years' worth of reports where death was from natural causes 4 <sup>th</sup> February 2019 | 4. UNSURE       |
| All Wales Palliative Care Planning Group 2008<br>Report to Minister for Health and Social services on Palliative care Services – Sugar Report<br><a href="http://www.wales.nhs.uk/documents/palliativecarereport.pdf">www.wales.nhs.uk/documents/palliativecarereport.pdf</a>                                                                           | Searched and added to table                                                                                  | 5. Not relevant |
| Secretariat of the Commission of the Bishops' Conferences of the European Community 2016<br>Opinion of the Working Group on Ethics in Research and Medicine On Palliative Care in the European Union<br><a href="http://www.comece.eu/dl/psqIJJKooNNJqx4KJK/PalliativeCARE_EN.pdf">http://www.comece.eu/dl/psqIJJKooNNJqx4KJK/PalliativeCARE_EN.pdf</a> | Searched and added to table                                                                                  | 6. Not relevant |
| Addicott, R. Ashton, R. 2010<br>Delivering Better Care at the End of Life: The next steps. The King's Fund                                                                                                                                                                                                                                              | Searched and added to table                                                                                  | 7. Not relevant |

|                                                                                                                                                                                                                                                                                                                                                                                                                                                                                |                                    |                         |
|--------------------------------------------------------------------------------------------------------------------------------------------------------------------------------------------------------------------------------------------------------------------------------------------------------------------------------------------------------------------------------------------------------------------------------------------------------------------------------|------------------------------------|-------------------------|
| <a href="https://www.kingsfund.org.uk/sites/default/files/Delivering-better-care-end-of-life-Kings-Fund-January-2010-Leeds-Castle-EOLC.pdf">https://www.kingsfund.org.uk/sites/default/files/Delivering-better-care-end-of-life-Kings-Fund-January-2010-Leeds-Castle-EOLC.pdf</a>                                                                                                                                                                                              |                                    |                         |
| Addicott, R. Hiley, J. 2011<br>Issues Facing Commissioners in End-of-Life Care. London: The King's Fund<br><a href="https://www.kingsfund.org.uk/sites/default/files/issues-facing-commissioners-end-of-life-care-report-september2011.pdf">https://www.kingsfund.org.uk/sites/default/files/issues-facing-commissioners-end-of-life-care-report-september2011.pdf</a>                                                                                                         | <b>Searched and added to table</b> | <b>8. Not relevant</b>  |
| Addicott R, Ross S. 2010<br>Implementing the End of Life Care Strategy. Lessons for Good Practice. The Kings Fund<br><a href="https://www.kingsfund.org.uk/sites/default/files/field/field_publication_file/Implementing-end-of-life-care-Rachael-Addicott-Shilpa-Ross-Kings-Fund-October2010_0.pdf">https://www.kingsfund.org.uk/sites/default/files/field/field_publication_file/Implementing-end-of-life-care-Rachael-Addicott-Shilpa-Ross-Kings-Fund-October2010_0.pdf</a> | <b>Searched and added to table</b> | <b>9. Not relevant</b>  |
| General Medical Council 2010<br>Treatment and Care Towards the End of Life: Good Practice in Decision Making<br><a href="https://www.gmc-uk.org/-/media/documents/treatment-and-care-towards-the-end-of-life---english-1015_pdf-48902105.pdf">https://www.gmc-uk.org/-/media/documents/treatment-and-care-towards-the-end-of-life---english-1015_pdf-48902105.pdf</a>                                                                                                          | <b>Searched and added to table</b> | <b>10. Not relevant</b> |
| Hall, S. Petkova, H. Tsouros, A. D. Costantini, M. Higginson, I. G. 2011<br>Palliative Care for Older People: Better Practices. Copenhagen WHO: Regional Office for Europe.<br><a href="http://www.euro.who.int/__data/assets/pdf_file/0017/143153/e95052.pdf">http://www.euro.who.int/__data/assets/pdf_file/0017/143153/e95052.pdf</a>                                                                                                                                       | <b>Searched and added to table</b> | <b>11. Not relevant</b> |
